# Supplementary material
Source: HighWire-hosted journal article supplement (https://jnm.snmjournals.org/highwire/filestream/94505/field_highwire_adjunct_files/0/120261_Supplemental_Data.pdf)
Supplement: 120261_Supplemental_Data.pdf [file 120261_Supplemental_Data.pdf]

## SUPPLEMENTAL DATA

**SUPPLEMENTAL TABLE 1.** [<sup>18</sup>F]FTC-146 brain-to-skull ratios 60 min after radiotracer injection.

| <b>Species/strain</b>                                | <b>Brain-to-skull ratio<br/>(Biodistribution data)</b> | <b>Brain-to-skull ratio<br/>(PET data)</b> |
|------------------------------------------------------|--------------------------------------------------------|--------------------------------------------|
| <b>Mouse</b> – <i>Balb/c</i>                         | 1.2 ± 0.1<br><i>n</i> = 3                              | 1.0 ± 0.1<br><i>n</i> = 3                  |
| <b>Rat</b> – <i>Sprague<br/>Dawley</i>               | 2.6 ± 0.4<br><i>n</i> = 4                              | 3.1 ± 0.2<br><i>n</i> = 3                  |
| <b>Non-human primate</b><br>– <i>Squirrel Monkey</i> | N/A                                                    | 1.2 ± 0.1<br><i>n</i> = 2                  |

Errors are expressed as standard error of the mean (SEM). N/A = not applicable.

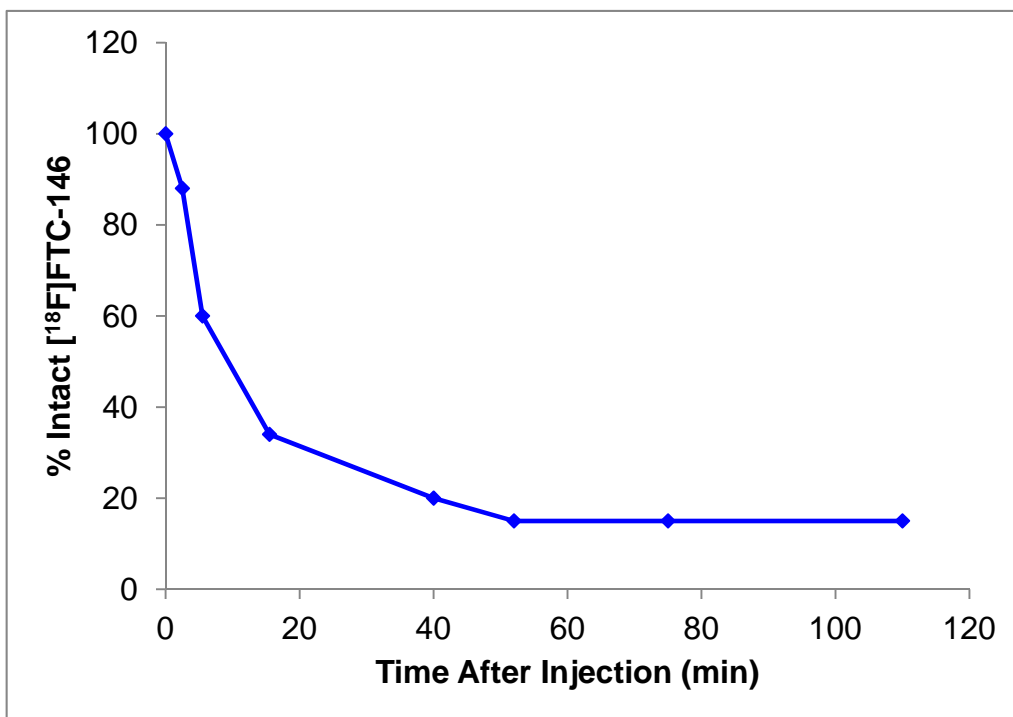

**SUPPLEMENTAL FIGURE 1.** *In vivo* stability of [<sup>18</sup>F]FTC-146 in monkey plasma. The graph represents the percentage of intact (unmetabolized) [<sup>18</sup>F]FTC-146 over time.

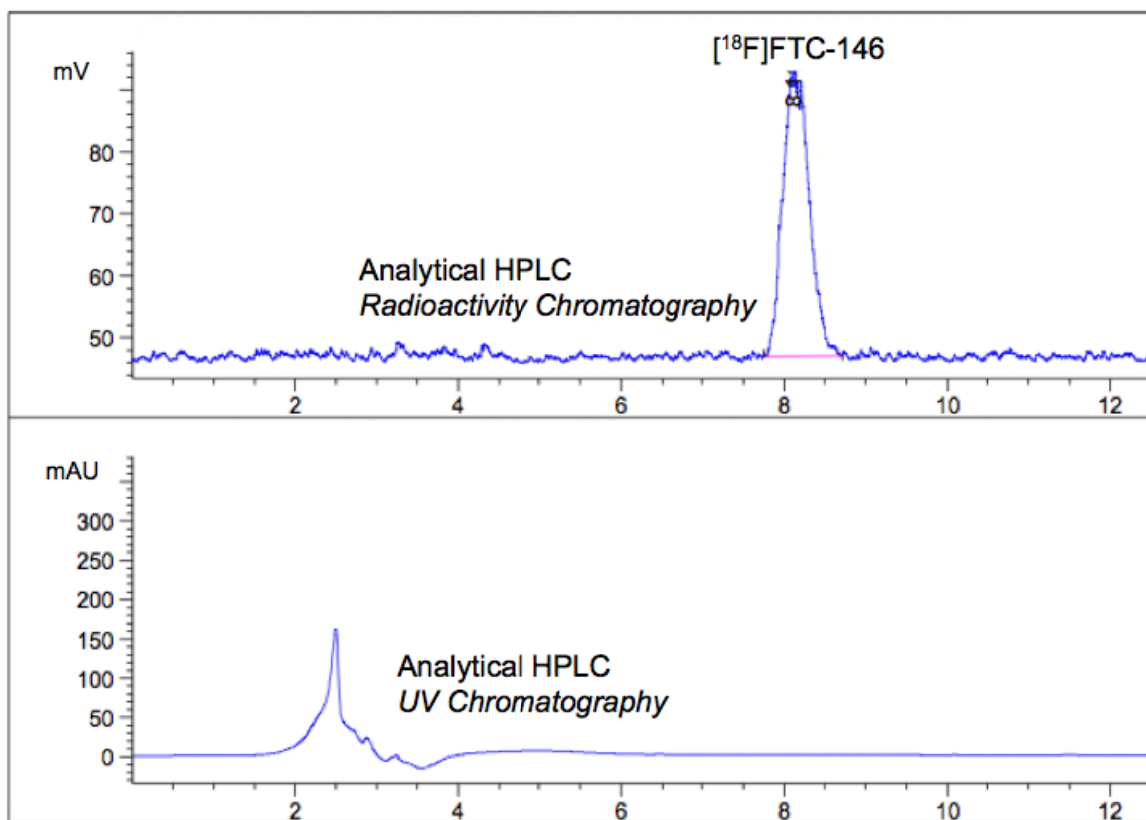

**SUPPLEMENTAL FIGURE 2.** HPLC chromatograms of radioactive (top) and UV-active (bottom) compounds in human serum after 120 min incubation of  $[^{18}\text{F}]\text{FTC-146}$  at 37 °C.
